# Supplementary material for: Epigenome-Guided Analysis of the Transcriptome of Plaque Macrophages during Atherosclerosis Regression Reveals Activation of the Wnt Signaling Pathway
Source: PLoS Genet. 2014 Dec 4;10(12):e1004828. doi: 10.1371/journal.pgen.1004828 (PMC4256277; doi:10.1371/journal.pgen.1004828)
Supplement: Table S7 — Risk SNPs for atherosclerosis or CAD that coincide with regression-associated monocyte expression QTLs. Columns are as follows: (A) RefSNP ID; (B) Trait (MeSH term); (C) Context (location relative to nearest gene; “nearGene-3” indicates that the SNP is located downstream of the 3′ end of a gene). (XLSX) [file pgen.1004828.s015.xlsx]

## Sheet: Sheet1
Reversa	Trait	Context
rs599839	Coronary Artery Disease	nearGene-3
rs646776	Myocardial Infarction	nearGene-3
rs16858964	Coronary Artery Disease	intron
rs774861	Coronary Artery Disease	intron
rs16858950	Coronary Artery Disease	intron
rs11910910	Coronary Artery Disease	intergenic
Transplant
rs989549	Coronary Artery Disease	intron
rs989548	Coronary Artery Disease	intron
rs1396477	Coronary Artery Disease	intron
rs10519994	Coronary Artery Disease	intron
rs968008	Coronary Artery Disease	intron
rs11952334	Coronary Artery Disease	intergenic
rs4129959	Coronary Artery Disease	intergenic
rs13167932	Coronary Artery Disease	intergenic
rs7715766	Coronary Artery Disease	intergenic
rs11949017	Coronary Artery Disease	intron
rs406685	Coronary Artery Disease	intron
